# Supplementary material
Source: publisher figshare collection journal article supplement (https://tandf.figshare.com/ndownloader/files/20219856)
Supplement: Supplementary file 1 [file 20219856]

**Estimating ground-level particulate matter concentrations using satellite-based data: A review**

Minso Shin1, Yoojin Kang1, Seohui Park1, Jungho Im1,*, Cheolhee Yoo1, Lindi J. Quackenbush2

1*School of Urban & Environmental Engineering, Ulsan National Institute of Science and Technology, Ulsan, 44919, Republic of Korea*

2*Environmental Resources Engineering, State University of New York, College of Environmental Science and Forestry, Syracuse, NY 13210, USA*

The first two authors equally contributed to the paper.

*Corresponding Author

Jungho Im ([**ersgis@unist.ac.kr**](mailto:ersgis@unist.ac.kr)**)**

Table S1. Summary of the reviewed papers in this study.

| **Authors (year)** | **Study area (nation scale)** | **Satellite dataa  (AOD)** | **Methodb** | **Resultsc** | **Target** |
| --- | --- | --- | --- | --- | --- |
| Gupta and Christopher (2009a) | U.S. | MODIS | ANN | R = 0.78 (daily) | PM2.5 |
| Gupta and Christopher (2009b) | U.S. | MODIS | MLR | R = 0.51-0.73 (daily) | PM2.5 |
| Tian and Chen (2010) | Canada | MODIS | Nonlinear empirical model | R2 = 0.65, RMSE = 6.1 (hourly) | PM2.5 |
| van Donkelaar et al. (2010) | Global | MODIS, MISR | CTM | R = 0.77 (daily) | PM2.5 |
| Wang et al. (2010) | China | MODIS | Vertical correction model | PM10: R2 = 0.47 PM2.5: R2 = 0.47(daily) | PM10, PM2.5 |
| Kloog et al. (2011) | U.S. | MODIS | GAMM | 10CV-R2 = 0.81-0.83 (daily) | PM2.5 |
| van Donkelaar et al. (2011) | Russia | MODIS | CTM | R2 = 0.85 (daily) | PM2.5 |
| Mao et al. (2012) | U.S. | MODIS | LUR | CV-R2 = 0.58 (monthly) | PM2.5 |
| Chang, Hu, and Liu (2013) | U.S. | MODIS | MEM | CV-R2 = 0.78, RMSE = 3.61 (daily) | PM2.5 |
| Hu et al. (2013) | U.S. | MODIS | GWR | R = 0.94, RMSPE = 2.32-2.37 CV-R = 0.82-0.84, RMSPE = 3.81-4.14 (daily) | PM2.5 |
| Nordio et al. (2013) | Italy | MODIS | 4-stage MEM | 10CV-R2 = 0.79 (daily) | PM10 |
| Sorek-Hamer et al. (2013) | U.S. | MODIS, OMI | LR, MARS, GAM | R2 = 0.2-0.71, RMSE = 6.70-6.83 (daily) | PM2.5 |
| Chen et al. (2014) | China | Landsat OLI/TIRS | MLR | R2 = 0.72, RMSE = 3.32 | PM2.5 |
| Chudnovsky et al. (2014) | U.S. | MODIS MAIAC | MEM | R2 = 0.89 (daily) | PM2.5 |
| Hu et al. (2014) | U.S. | MODIS MAIAC | 2-stage model | CV-R2 = 0.67 | PM2.5 |
| Kloog et al. (2014) | U.S. | MODIS MAIAC | MEM | 10CV-R2 = 0.88, RMSE = 2.33 (daily) | PM2.5 |
| Ma et al. (2014) | China | MODIS | GWR | R2 = 0.71, RMSE = 29.58 (daily) | PM2.5 |
| Saleh and Hasan (2014) | Iraq | Landsat OLI | MLR | R = 0.83, RMSE = 11.84 | PM10 |
| Saunders, Kahl, and Ghorai (2014) | U.S. | MODIS | MLR | R2 = 0.51 (daily) | PM2.5 |
| Song et al. (2014) | China | MODIS | GWR | Mean relative accuracy = 88.6% (daily) | PM2.5 |
| Chitranshi, Sharma, and Dey (2015) | India | MODIS | Logistic regression | R = 0.76, RSE = 8.86 % (daily) | PM10 |
| Geng et al. (2015) | China | MODIS, MISR | CTM | R = 0.74 (monthly) | PM2.5 |
| Kloog et al. (2015) | Israel | MODIS MAIAC | MEM | PM10: CV-R2 = 0.79 PM2.5: CV-R2 = 0.72 (daily) | PM10, PM2.5 |
| Li et al. (2015) | China | MODIS | MEM | R2 = 0.847, RMSE = 13.88 CV-R2 = 0.796, RMSE = 16.04 (daily) | PM2.5 |
| Lin et al. (2015) | China | MODIS | Nonlinear empirical model | R = 0.76 (monthly) | PM2.5 |
| Luo et al. (2015) | China | Landsat ETM+ | MLR | R2 = 0.55 | PM10 |
| van Donkelaar et al. (2015) | U.S. | MODIS | CTM-GWR | R2 = 0.82 (monthly) | PM2.5 |
| Xie et al. (2015) | China | MODIS | MEM | CV-R2 = 0.75-0.79 (daily) | PM2.5 |
| Xu et al. (2015) | China | GOCI | CTM | RMSE = 13.1 (for monthly) | PM2.5 |
| You, Zang, Zhang, et al. (2015) | China | MODIS | GWR | R2 = 0.82, RMSE = 15.30 CV-R2 = 0.77, RMSE = 16.91 (daily) | PM10 |
| You, Zang, Pan, et al. (2015) | China | MODIS, MISR | GAM | R = 0.82-0.85, RMSE = 32.95-40.88 (daily) | PM2.5 |
| Zhang and Li (2015) | China | MODIS, MISR | Vertical correction model | R = 0.5, MSE = 64 (hourly) | PM2.5 |
| Bai et al. (2016) | China | MODIS SARA | GTWR | CV-R2 = 0.87, RMSE = 21.77 (daily) | PM2.5 |
| Di et al. (2016) | U.S. | MODIS MAIAC | 2-stage NN | CV-R2 = 0.84, RMSE = 2.94 (annual) | PM2.5 |
| Fang et al. (2016) | China | MODIS | TSAM | 10CV-R2 = 0.80 (annual) | PM2.5 |
| Ghotbi, Sotoudeheian, and Arhami (2016) | Iran | MODIS | MEM | 10CV-R2 = 0.73, RMSE = 16.91 (daily) | PM10 |
| Lee, Chatfield, and Strawa (2016) | U.S. | MODIS | MEM | CV-R2 = 0.66, RMSE = 5.69 (daily) | PM2.5 |
| Li et al. (2016) | China | MODIS | Vertical correction model | Mean error = 38 (daily) | PM2.5 |
| Ma, Hu, et al. (2016) | China | MODIS | Hybrid MEM-GAM | R2 = 0.73 (monthly) | PM2.5 |
| Ma, Liu, et al. (2016) | China | MODIS | MEM | 10CV-R2 = 0.671 DOY-based-CV-R2 = 0.339 (daily) | PM2.5 |
| Meng et al. (2016) | China | MODIS | MEM | 10CV-R2 = 0.87, RMSE = 19.2 (daily) | PM10 |
| van Donkelaar et al. (2016) | Global | MODIS, MODIS MAIAC, MISR, SeaWiFS | CTM | R2 = 0.85, CV-R2 = 0.81 (annual) | PM2.5 |
| Wu et al. (2016) | China | VIIRS | 2-stage GWR | CV-R2 = 0.72, RMSE = 19.29 (daily) | PM2.5 |
| You, Zang, Zhang, Zhang, et al. (2016) | China | MODIS | GAM | R2 = 0.45 (for daily) | PM10 |
| You, Zang, Zhang, Li, and Wang (2016) | China | MODIS, MISR | GWR | CV-R2 = 0.76-0.81, RMSE = 22.26-27.46 (daily) | PM2.5 |
| You, Zang, Zhang, Li, Pan, et al. (2016) | China | MODIS | GWR | CV-R2 = 0.79, RMSE = 18.6 (daily) | PM2.5 |
| Zhang, Gong, et al. (2016) | China | MODIS | GWR | CV-R2 = 0.87 (daily) | PM2.5 |
| Zhang, Liu, et al. (2016) | China | MODIS | Semi-physical GWR | CV-R2 = 0.80-0.86 (daily) | PM2.5 |
| Zheng et al. (2016) | China | MODIS | MEM | LOOCV-R2 = 0.77-0.80, RMSE = 12.47-23.07 (daily) | PM2.5 |
| Zou et al. (2016) | China | MODIS SARA | GWR | 10CV-RMSE = 11 (annual) | PM2.5 |
| Gong et al. (2017) | China | MODIS | MEM | CV-R2 = 0.77 RMSE = 13.11 (daily) | PM2.5 |
| Guo et al. (2017) | China | MODIS | GTWR | CV R2 = 0.58, RMSE = 30.81 (daily) | PM2.5 |
| Hu et al. (2017) | U.S. | MODIS | RF | CV-R2 = 0.80, RMSE = 2.83 (daily) | PM2.5 |
| Jiang et al. (2017) | China | MODIS | GWR | CV-R2 = 0.74-0.79 (daily) | PM2.5 |
| Li, Shen, Yuan, et al. (2017) | China | MODIS | Geoi-DBN | R2 = 0.88, RMSE = 13.03 (daily) | PM2.5 |
| Li, Shen, Zeng, et al. (2017) | China | MODIS | GRNN | CV-R = 0.82, RMSE = 20.93 (daily) | PM2.5 |
| Lv et al. (2017) | China | MODIS | Bayesian linear regression model | 10CV-R2 = 0.58 LOCCV-R2 = 0.47 (daily) | PM2.5 |
| Mao, Shen, and Feng (2017) | China | MODIS | MLP | 12h forecast RMSE = 45.29 | PM2.5 |
| Pereira et al. (2017) | Australia | MODIS | MEM | LOOCV-R2 = 0.46, RMSE = 6 (daily) | PM10 |
| Stafoggia et al. (2017) | Italy | MODIS MAIAC | 4-stage MEM | 10CV-R2 = 0.72, RMSPE = 9.0 (stage 3) (daily) | PM10 |
| Xiao et al. (2017) | China | MODIS MAIAC | MEM-GAM | R2 = 0.77 (for daily) 10CV-R2 = 0.73-0.81, RMSE = 18-25 (for each year) | PM2.5 |
| Yan et al. (2017) | China | MODIS | Nonlinear empirical model | R2 = 0.64, RMSE = 18.9 (hourly) | PM2.5 |
| Yang et al. (2017) | China | MODIS, MISR, SeaWiFS | LUR | R2 = 0.707-0.895, LOOCV-R2 = 0.588-0.872, LOOCV-RMSE = 2.754-5.118 (annual) | PM2.5 |
| Yeganeh et al. (2017) | Australia | OMI | ANFIS, SVM, BPANN | R2 = 0.61-0.84, RMSE = 0.94-1.57, CV-R2 = 0.54-0.81, CV-RMSE = 1.79-2.11 (monthly) | PM2.5 |
| Zhan et al. (2017) | China | MODIS MAIAC | GW-GBM | CV-R2 = 0.74-0.76, RMSE = 23.0-24.3 (daily) | PM2.5 |
| Zou et al. (2017) | China | MODIS | GAM | CV-R2 = 0.78-0.90 (seasonally) | PM2.5 |
| Brokamp et al. (2018) | U.S. | MODIS | RF | CV-R2 = 0.91, RMSE = 2.22 (daily) | PM2.5 |
| Chen, Li, et al. (2018) | China | MODIS | RF | 10CV-R2 = 0.83, RMSE = 18.0 (daily) | PM2.5 |
| Chen, Zhang, et al. (2018) | China | MODIS | GAMM | CV-R2 = 0.81 (daily) | PM2.5 |
| Chen, Knibbs, et al. (2018) | China | MODIS | GAM | 10CV-R2 = 0.59 (for daily) | PM1 |
| de Hoogh et al. (2018) | Switzerland | MODIS MAIAC | 4-stage MEM-GAMM-SVR | R2 = 0.784-0.912, RMSE = 2.874-4.470 (daily) 10CV-R2 = 0.642-0.816, 10CV-RMSE = 3.710-5.783 (daily) | PM2.5 |
| Fu et al. (2018) | China | VIIRS | MEM | CV-R2 = 0.92 (daily) | PM2.5 |
| Gao et al. (2018) | China | Own AOD based on MODIS | Vertical correction model | R = 0.78 (daily) | PM2.5 |
| Geng, Murray, Tong, et al. (2018) | U.S. | MODIS MAIAC | Bayesian ensemble model | 10CV-R2 = 0.66, RMSE = 2 (daily) | PM2.5 |
| Geng, Murray, Chang, et al. (2018) | U.S. | MODIS MAIAC | 2-stage Bayesian ensemble | 10CV-R2 = 0.82, RMSE = 3.01 (daily) | PM2.5 |
| Han et al. (2018) | China | MODIS MAIAC | MEM | CV-R2 = 0.87-0.93 (daily) | PM2.5 |
| He and Huang (2018b) | China | MODIS | GTWR | R2 = 0.80, RMSE = 18 (daily) | PM2.5 |
| He and Huang (2018a) | China | MODIS | GTWR, i-GTWR | GTWR: CV-R2 = 0.82 i-GTWR: CV-R2 = 0.46(daily) | PM2.5 |
| Huang et al. (2018) | China | MODIS MAIAC | RF | CV-R2 = 0.88 (monthly) | PM2.5 |
| Jiang and Christakos (2018) | China | MODIS | GBM & BME | 10CV-R2 = 0.86, RMSE = 14.37 (daily) | PM2.5 |
| Jung, Hwang, and Chen (2018) | Taiwan | MODIS | MEM | CV-R2 = 0.66, RMSE = 12.9-14.0 (daily) | PM2.5 |
| Li, Zhang, et al. (2018) | China | MODIS MAIAC | MEM | CV-R2 = 0.87 R2 = 0.75 (for independent day) (daily) | PM2.5 |
| Li, Xue, et al. (2018) | China | MODIS MAIAC | SPSEMCA | R = 0.7-0.75, RMSE = 43.38-58.75 (daily) | PM2.5 |
| Li, Chen, et al. (2018) | China | MODIS | OR, DT, RF, SVM | 5CV-R = 0.68-0.85, RMSE = 33.90-52.63 (daily) | PM2.5 |
| Li, Ma, et al. (2018) | China | MODIS MAIAC | LUR | R2 = 0.93, RMSE = 4.10 (yearly) | PM2.5 |
| Lin et al. (2018) | China | MODIS | Vertical correction model | R = 0.78, RMSE = 19.3 (monthly) | PM2.5 |
| Pang et al. (2018) | China | GOCI, VIIRS | DA | ER = 8% (hourly) | PM2.5 |
| Qin et al. (2018) | China | MODIS | GTWR | 10CV-R2 = 0.74, RMSE = 13.02 (daily) | PM2.5 |
| Shi et al. (2018) | Hong Kong | MODIS | GTWR | LOOCV-R2 = 0.654, RMSE = 9.641 (annual) | PM2.5 |
| Soni, Payra, and Verma (2018) | India | MODIS | LR, MLR, log-LR | R = 0.8 (daily) | PM10 |
| Xiao, Lang, and Christakos (2018) | China | MODIS | BME-GWR | CV-R2 = 0.883, RMSE = 11.39 (monthly) | PM2.5 |
| Xu et al. (2018) | Canada | MODIS | MLR, BRNN, SVM, LASSO, MARS, RF, XGB, DT | 10CV-R2 = 0.22-0.49, RMSE = 2.64-3.24 (monthly) | PM2.5 |
| Yao et al. (2018) | China | MODIS, VIIRS | Time fixed effect regression | R2 = 0.71-0.76, CV-R2 = 0.66-0.72 (daily) | PM2.5 |
| Zang et al. (2018) | China | AHI | MLR, MEM, BPNN, GRNN, PCA-GRNN | R2 = 0.23-0.65, RMSE = 22-32.8 (hourly) | PM1 |
| Zhai et al. (2018) | China | MODIS | BSR-PCA-GWR | CV-adjusted-R2 = 0.860, RMSE = 7.717 (annual) | PM2.5 |
| Zhang, Di, et al. (2018) | China | MODIS | RF | R2 = 0.86 (for daily) | PM2.5 |
| Zhang, Zhu, et al. (2018) | China | GF-1 | MEM | site CV-R2 = 0.88-0.92 DOY CV-R2 = 0.54-0.58 (every 4 days) | PM2.5 |
| Zhang, Wang, et al. (2018) | China | MODIS | GAMM | PM10: R2 = 0.71, RMSE = 3.86, CV-R2 = 0.62 PM2.5: R2 = 0.87, RMSE = 12.41, CV-R2 = 0.85 (monthly) | PM10, PM2.5 |
| Zhang, Chu, et al. (2018) | U.S. | MODIS MAIAC | MEM | 10CV-R2 = 0.63-0.69 (daily for each year) | PM2.5 |
| Bai et al. (2019) | China | MODIS, MISR, SeaWiFS | GWR | CV R2 = 0.75, RMSE = 13.59 (monthly) | PM2.5 |
| Bi et al. (2019) | U.S. | MODIS MAIAC | RF | 10CV-R2 = 0.82, RMSE = 2.16 (daily) | PM2.5 |
| Chen et al. (2019) | China | MODIS | XGB | CV-R2 = 0.86, RMSE = 14.98 (daily) | PM2.5 |
| Chu and Bilal (2019) | Taiwan | MODIS | GTWR | R2 = 0.83, RMSE = 7.9 (daily) | PM2.5 |
| Di et al. (2019) | U.S. | MODIS | 2-stage ensemble | 10CV-R2 = 0.86, 10CV-RMSE = 2.786 (daily) | PM2.5 |
| Goldberg et al. (2019) | U.S. | MODIS MAIAC | MLR | CV-R2 = 0.75 (daily) | PM2.5 |
| Han and Tong (2019) | China | MODIS MAIAC | MEM | R2 = 0.81, RMSPE = 15.47 (daily) | PM2.5 |
| Hu et al. (2019) | China | MODIS | STRK | CV-R2 = 0.87, RMSE = 16.55 (daily) | PM2.5 |
| Hua et al. (2019) | China | MODIS | 2-stage GAM | 10CV-R2 = 0.78, RMSE = 19.177 (daily) | PM2.5 |
| Kumar et al. (2019) | U.S. | MODIS NNR | DA | R = 0.67 (daily) | PM2.5 |
| Li and Zhang (2019) | China | MODIS | RF | 10CV-R2 = 0.933, RMSE = 16.315 (daily) | PM2.5 |
| Liu, Weng, and Li (2019) | China | Own AOD based on AHI, AHI | RF | R2 = 0.86, RMSE = 17.3 (hourly) | PM2.5 |
| Nabavi, Haimberger, and Abbasi (2019) | Iran | MODIS, MODIS MAIAC | RF | R2 = 0.68, RMSE = 17.52 (daily) | PM2.5 |
| Park et al. (2019) | South Korea | GOCI | RF | PM10: R2 = 0.78, RMSE = 17.08 PM2.5: R2 = 0.73, RMSE = 8.25 (hourly) | PM10, PM2.5 |
| Sarafian et al. (2019) | U.S. | MODIS MAIAC | MEM, GMRF | 10CV-R2 = 0.80-0.83, RMSE = 2.42-2.68 (daily) | PM2.5 |
| Sathe et al. (2019) | India | MODIS | MLR | R = 0.61, RMSE = 77.89 (hourly) | PM2.5 |
| Stafoggia et al. (2019) | Italy | MODIS MAIAC | RF-LUR | PM10: R2 = 0.84 PM2.5: R2 = 0.86 (daily) | PM10, PM2.5 |
| Sun et al. (2019) | China | AHI | DNN | CV-R2 = 0.84, CV-RMSE = 19.9 (hourly) | PM2.5 |
| van Donkelaar et al. (2019) | U.S. | MODIS, MODIS MAIAC, MISR, SeaWiFS | CTM | R2 = 0.76 (annual) | PM2.5 |
| Wang and Sun (2019) | China | MODIS | DNN | R2 = 0.87, RMSE = 27.11 (daily) | PM2.5 |
| Wang, Mao, et al. (2019) | China | AHI | MEM-BT | 10CV-R2 = 0.80, RMSE = 15.4 (hourly) | PM1 |
| Wang, Zhao, et al. (2019) | China | MODIS | S-BPNN | 10CV-R2 = 0.89, 10CV-RMSE = 5.8 (daily) | PM2.5 |
| Wei et al. (2019) | China | MODIS MAIAC | STRF | 10CV-R2 = 0.85, RMSE = 15.57 (daily) | PM2.5 |
| Xie et al. (2019) | China | MODIS SARA | MEM | 10CV-R2 = 0.82, RMSE = 31.88 (daily) | PM2.5 |
| Xue et al. (2019) | China | MODIS | 2-stage HD Expansion-GAM | LOYCV-R2 = 0.55 (daily) | PM2.5 |
| Yang, Xu, and Jin (2019) | China | MODIS | MEM-SVR model | R2 = 0.77, RMSE = 9.51 (daily) | PM2.5 |
| Yao et al. (2019b) | China | VIIRS | 2-stage TFER-GWR | 10CV-R2 = 0.60 (daily) | PM2.5 |
| Yao et al. (2019a) | China | VIIRS | 2-stage TFER-GWR | 10CV-R2 = 0.81 (daily) | PM2.5 |
| Zang et al. (2019) | China | AHI | MLR, GRNN, PCA-integrated GRNN | R2 = 0.21-0.74, RMSE = 19-33.3 (hourly) | PM1 |
| Zhang et al. (2019) | China | AHI | MEM | 10CV-R2 = 0.74-0.84 (hourly) | PM2.5 |
| Zeydan and Wang (2019) | Turkey | MODIS | MLR | R2 = 0.61, RMSE = 0.337 (daily) | PM2.5 |

a Instrument: Advanced Himawari Imager (AHI), Gaofen-1 (GF-1), Geostationary Ocean Color Imager (GOCI), Multi-angle Imaging SpectroRadiometer (MISR), Moderate Resolution Imaging Spectroradiometer (MODIS), MODIS Multi-Angle Implementation of Atmospheric Correction (MODIS MAIAC), MODIS Neural Net Retrievals (MODIS NNR), MODIS Simplified Aerosol Retrieval Algorithm (MODIS SARA), Ozone Monitoring Instrument (OMI), Sea-viewing Wide Field-of-View Sensor (SeaWiFS), Visible Infrared Imaging Radiometer Suite (VIIRS)

b Methods - Adaptive Neuro-Fuzzy Inference System (ANFIS), Bayesian Maximum Entropy (BME), Back-Propagation Artificial Neural Network (BPANN), Back-Propagation Neural Network (BPNN), Bayesian Regularized Neural Network (BRNN), Best Subset Regression (BSR), Bagged Trees (BT), Data Assimilation (DA), Deep Belief Network (DBN), Deep Neural Network (DNN), Decision Trees (DT), Gaussian Markov Random Field (GMRF), Generalized Regression Neural Network (GRNN), Least Absolute Shrinkage and Selection Operator (LASSO), Multivariate Adaptive Regression Splines (MARS), Orthogonal Regression (OR), Principal Component Analysis (PCA), Random Forest (RF), Spatial Back-Propagation Neural Network (S-BPNN), Specific Particle Swarm Extinction Mass Conversion Algorithm (SPSEMCA), Space-Time Random Forest (STRF), Spatiotemporal Regression Kriging (STRK), Support Vector Machine (SVM), Time Fixed Effects Regression (TFER), Timely Structure Adaptive Modeling (TSAM), Extreme Gradient Boost (XGB)

c Statistics in results - Correlation coefficient (R), Relative Standard Error (RSE), Coefficient of determination (R2), Root Mean Square Error (RMSE; μg/m3), Root Mean Square Percent Error(RMSPE; μg/m3), Error Reduction (ER), Cross-Validation (CV), 5-fold Cross-Validation (5CV), 10-fold Cross-Validation (10CV), Leave-One-Out Cross-Validation (LOOCV), Leave-One-City-Out-Cross Validation (LOCCV), Leave-One-Year-Out-Cross Validation (LOYCV)


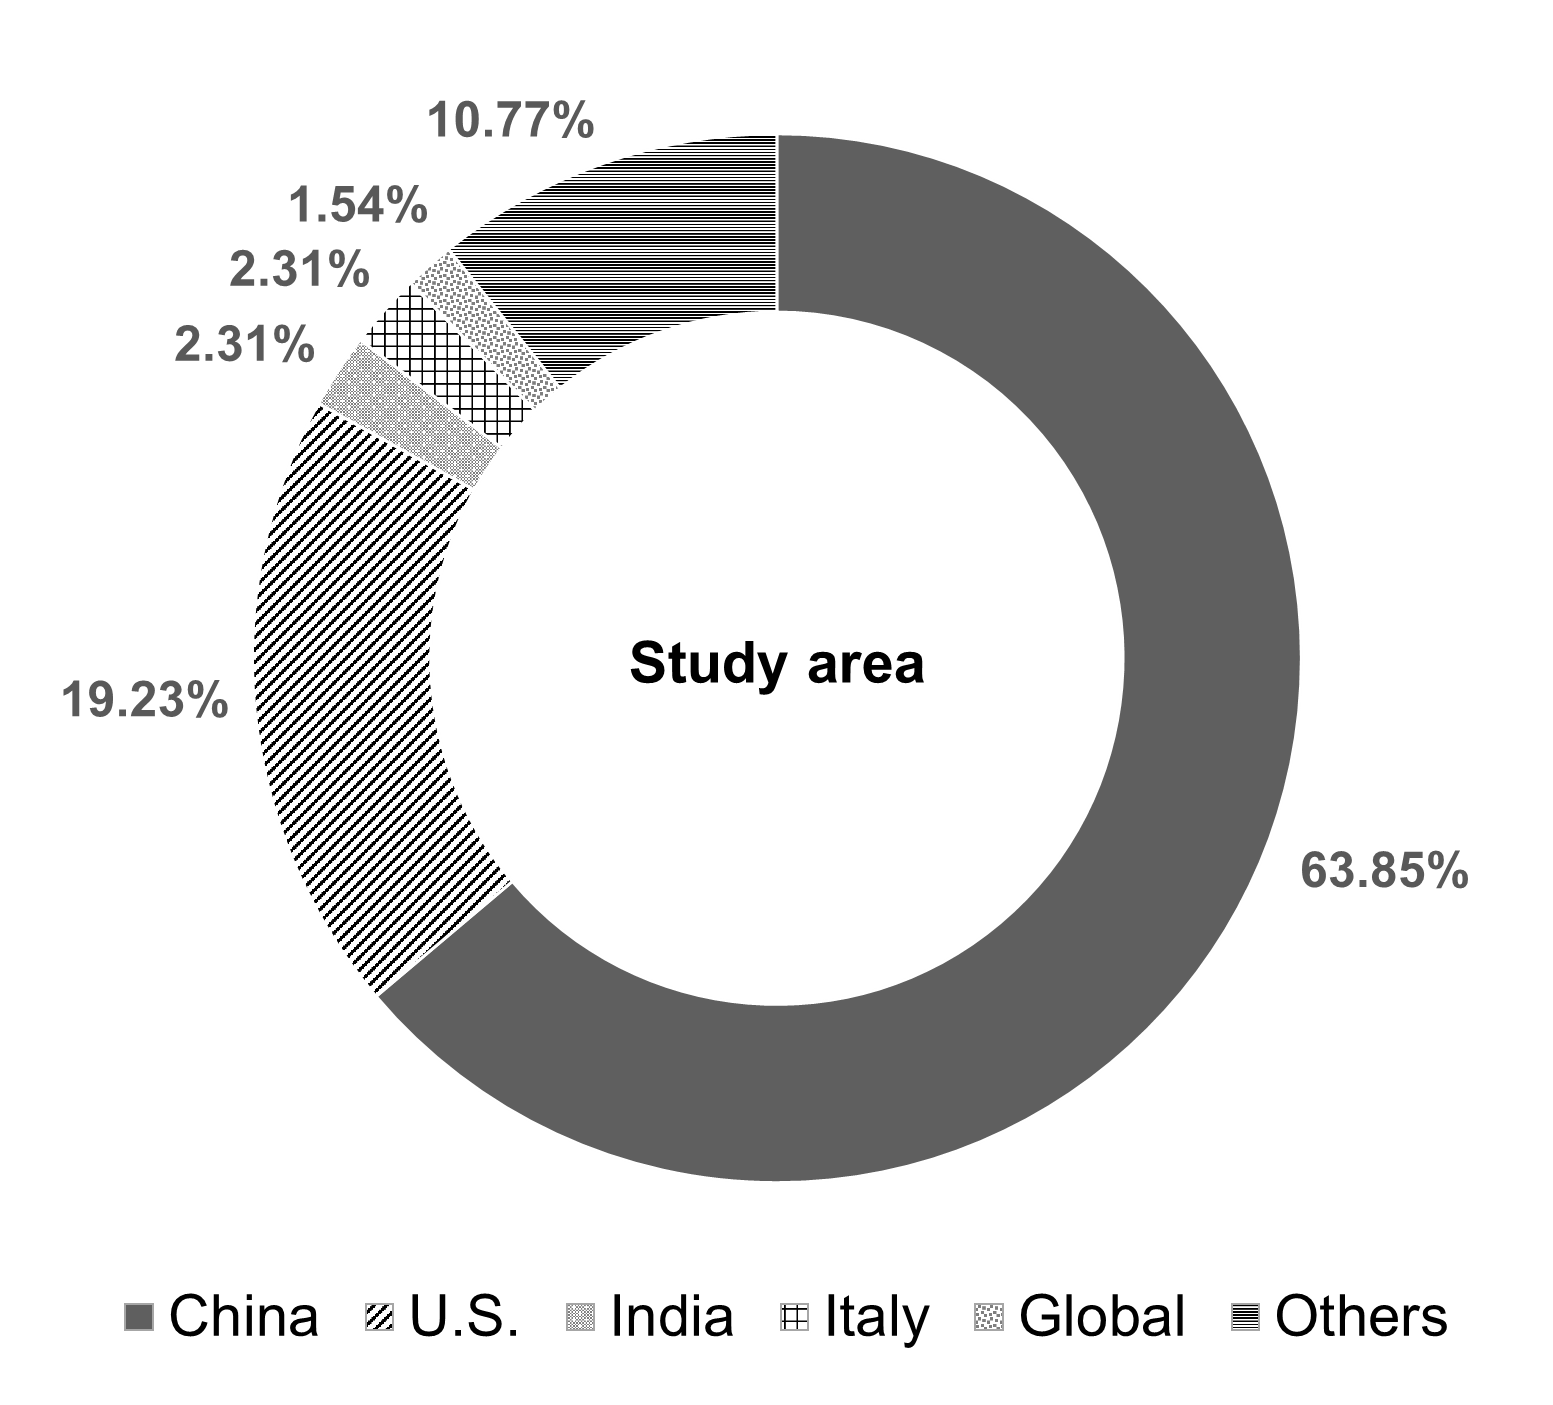


Figure S1. The distribution of study areas in the reviewed papers that predicted ground PM concentrations using satellite AOD as the main input predictor during the past 10 years.

Bai, Kaixu, Mingliang Ma, Ni-Bin Chang, and Wei Gao. 2019. "Spatiotemporal trend analysis for fine particulate matter concentrations in China using high-resolution satellite-derived and ground-measured PM2.5 data."  *Journal of Environmental Management* 233:530-42. doi: <https://doi.org/10.1016/j.jenvman.2018.12.071>.

Bai, Yang, Lixin Wu, Kai Qin, Yufeng Zhang, Yangyang Shen, and Yuan Zhou. 2016. "A geographically and temporally weighted regression model for ground-level PM2.5 estimation from satellite-derived 500 m resolution AOD."  *Remote Sensing* 8 (3):262.

Bi, Jianzhao, Jessica H. Belle, Yujie Wang, Alexei I. Lyapustin, Avani Wildani, and Yang Liu. 2019. "Impacts of snow and cloud covers on satellite-derived PM2.5 levels."  *Remote Sensing of Environment* 221:665-74. doi: <https://doi.org/10.1016/j.rse.2018.12.002>.

Brokamp, Cole, Roman Jandarov, Monir Hossain, and Patrick Ryan. 2018. "Predicting Daily Urban Fine Particulate Matter Concentrations Using a Random Forest Model."  *Environmental Science & Technology* 52 (7):4173-9.

Chang, Howard H., Xuefei Hu, and Yang Liu. 2013. "Calibrating MODIS aerosol optical depth for predicting daily PM2.5 concentrations via statistical downscaling."  *Journal Of Exposure Science And Environmental Epidemiology* 24:398. doi: 10.1038/jes.2013.90

<https://www.nature.com/articles/jes201390#supplementary-information>.

Chen, Gongbo, Luke D. Knibbs, Wenyi Zhang, Shanshan Li, Wei Cao, Jianping Guo, Hongyan Ren, et al. 2018. "Estimating spatiotemporal distribution of PM1 concentrations in China with satellite remote sensing, meteorology, and land use information."  *Environmental Pollution* 233:1086-94. doi: <https://doi.org/10.1016/j.envpol.2017.10.011>.

Chen, Gongbo, Shanshan Li, Luke D Knibbs, NAS Hamm, Wei Cao, Tiantian Li, Jianping Guo, Hongyan Ren, Michael J Abramson, and Yuming Guo. 2018. "A machine learning method to estimate PM2.5 concentrations across China with remote sensing, meteorological and land use information."  *Science of the Total Environment* 636:52-60.

Chen, Yunping, Weihong Han, Shuzhong Chen, and Ling Tong. 2014. *Estimating ground-level PM2.5 concentration using Landsat 8 in Chengdu, China*. Vol. 9259, *SPIE Asia-Pacific Remote Sensing*: SPIE.

Chen, Zhao-Yue, Tian-Hao Zhang, Rong Zhang, Zhong-Min Zhu, Chun-Quan Ou, and Yuming Guo. 2018. "Estimating PM2.5 concentrations based on non-linear exposure-lag-response associations with aerosol optical depth and meteorological measures."  *Atmospheric environment* 173:30-7. doi: <https://doi.org/10.1016/j.atmosenv.2017.10.055>.

Chen, Zhao-Yue, Tian-Hao Zhang, Rong Zhang, Zhong-Min Zhu, Jun Yang, Ping-Yan Chen, Chun-Quan Ou, and Yuming Guo. 2019. "Extreme gradient boosting model to estimate PM2.5 concentrations with missing-filled satellite data in China."  *Atmospheric environment* 202:180-9. doi: <https://doi.org/10.1016/j.atmosenv.2019.01.027>.

Chitranshi, Shikha, Satya Prakash Sharma, and Sagnik Dey. 2015. "Satellite-based estimates of outdoor particulate pollution (PM10) for Agra City in northern India."  *Air Quality, Atmosphere & Health* 8 (1):55-65. doi: 10.1007/s11869-014-0271-x.

Chu, Hone-Jay, and Muhammad Bilal. 2019. "PM2.5 mapping using integrated geographically temporally weighted regression (GTWR) and random sample consensus (RANSAC) models."  *Environmental Science and Pollution Research* 26 (2):1902-10. doi: 10.1007/s11356-018-3763-7.

Chudnovsky, Alexandra A, Petros Koutrakis, Itai Kloog, Steven Melly, Francesco Nordio, Alexei Lyapustin, Yujie Wang, and Joel Schwartz. 2014. "Fine particulate matter predictions using high resolution Aerosol Optical Depth (AOD) retrievals."  *Atmospheric environment* 89:189-98.

de Hoogh, Kees, Harris Héritier, Massimo Stafoggia, Nino Künzli, and Itai Kloog. 2018. "Modelling daily PM2.5 concentrations at high spatio-temporal resolution across Switzerland."  *Environmental Pollution* 233:1147-54. doi: <https://doi.org/10.1016/j.envpol.2017.10.025>.

Di, Qian, Heresh Amini, Liuhua Shi, Itai Kloog, Rachel Silvern, James Kelly, M. Benjamin Sabath, et al. 2019. "An ensemble-based model of PM2.5 concentration across the contiguous United States with high spatiotemporal resolution."  *Environment International* 130:104909. doi: <https://doi.org/10.1016/j.envint.2019.104909>.

Di, Qian, Itai Kloog, Petros Koutrakis, Alexei Lyapustin, Yujie Wang, and Joel Schwartz. 2016. "Assessing PM2.5 Exposures with High Spatiotemporal Resolution across the Continental United States."  *Environmental Science & Technology* 50 (9):4712-21. doi: 10.1021/acs.est.5b06121.

Fang, Xin, Bin Zou, Xiaoping Liu, Troy Sternberg, and Liang Zhai. 2016. "Satellite-based ground PM2.5 estimation using timely structure adaptive modeling."  *Remote Sensing of Environment* 186:152-63.

Fu, D., X. Xia, M. Duan, X. Zhang, X. Li, J. Wang, and J. Liu. 2018. "Mapping nighttime PM2.5 from VIIRS DNB using a linear mixed-effect model."  *Atmospheric environment* 178:214-22. doi: <https://doi.org/10.1016/j.atmosenv.2018.02.001>.

Gao, Chao, Xuelei Zhang, Wenyong Wang, Aijun Xiu, Daniel Q. Tong, and Weiwei Chen. 2018. "Spatiotemporal Distribution of Satellite-Retrieved Ground-Level PM2.5 and Near Real-Time Daily Retrieval Algorithm Development in Sichuan Basin, China."  *Atmosphere* 9 (2):78.

Geng, Guannan, Nancy L. Murray, Howard H. Chang, and Yang Liu. 2018. "The sensitivity of satellite-based PM2.5 estimates to its inputs: Implications to model development in data-poor regions."  *Environment International* 121:550-60. doi: <https://doi.org/10.1016/j.envint.2018.09.051>.

Geng, Guannan, Nancy L. Murray, Daniel Tong, Joshua S. Fu, Xuefei Hu, Pius Lee, Xia Meng, Howard H. Chang, and Yang Liu. 2018. "Satellite-Based Daily PM2.5 Estimates During Fire Seasons in Colorado."  *Journal of Geophysical Research: Atmospheres* 123 (15):8159-71. doi: 10.1029/2018JD028573.

Geng, Guannan, Qiang Zhang, Randall V. Martin, Aaron van Donkelaar, Hong Huo, Huizheng Che, Jintai Lin, and Kebin He. 2015. "Estimating long-term PM2.5 concentrations in China using satellite-based aerosol optical depth and a chemical transport model."  *Remote Sensing of Environment* 166:262-70. doi: <https://doi.org/10.1016/j.rse.2015.05.016>.

Ghotbi, Saba, Saeed Sotoudeheian, and Mohammad Arhami. 2016. "Estimating urban ground-level PM10 using MODIS 3km AOD product and meteorological parameters from WRF model."  *Atmospheric environment* 141:333-46.

Goldberg, Daniel L., Pawan Gupta, Kai Wang, Chinmay Jena, Yang Zhang, Zifeng Lu, and David G. Streets. 2019. "Using gap-filled MAIAC AOD and WRF-Chem to estimate daily PM2.5 concentrations at 1 km resolution in the Eastern United States."  *Atmospheric environment* 199:443-52. doi: <https://doi.org/10.1016/j.atmosenv.2018.11.049>.

Gong, Wei, Yusi Huang, Tianhao Zhang, Zhongmin Zhu, Yuxi Ji, and Hao Xiang. 2017. "Impact and Suggestion of Column-to-Surface Vertical Correction Scheme on the Relationship between Satellite AOD and Ground-Level PM2.5 in China."  *Remote Sensing* 9 (10). doi: 10.3390/rs9101038.

Guo, Yuanxi, Qiuhong Tang, Dao-Yi Gong, and Ziyin Zhang. 2017. "Estimating ground-level PM2.5 concentrations in Beijing using a satellite-based geographically and temporally weighted regression model."  *Remote Sensing of Environment* 198:140-9.

Gupta, Pawan, and Sundar A. Christopher. 2009a. "Particulate matter air quality assessment using integrated surface, satellite, and meteorological products: 2. A neural network approach."  *Journal of Geophysical Research: Atmospheres* 114 (D20). doi: 10.1029/2008JD011497.

———. 2009b. "Particulate matter air quality assessment using integrated surface, satellite, and meteorological products: Multiple regression approach."  *Journal of Geophysical Research: Atmospheres* 114 (D14). doi: 10.1029/2008JD011496.

Han, Weihong, and Ling Tong. 2019. "Satellite-Based Estimation of Daily Ground-Level PM2.5 Concentrations over Urban Agglomeration of Chengdu Plain."  *Atmosphere* 10 (5). doi: 10.3390/atmos10050245.

Han, Weihong, Ling Tong, Yunping Chen, Runkui Li, Beizhan Yan, and Xue Liu. 2018. "Estimation of High-Resolution Daily Ground-Level PM2.5 Concentration in Beijing 2013–2017 Using 1 km MAIAC AOT Data."  *Applied Sciences* 8 (12). doi: 10.3390/app8122624.

He, Qingqing, and Bo Huang. 2018a. "Satellite-based high-resolution PM2.5 estimation over the Beijing-Tianjin-Hebei region of China using an improved geographically and temporally weighted regression model."  *Environmental Pollution* 236:1027-37. doi: <https://doi.org/10.1016/j.envpol.2018.01.053>.

———. 2018b. "Satellite-based mapping of daily high-resolution ground PM 2.5 in China via space-time regression modeling."  *Remote Sensing of Environment* 206:72-83.

Hu, Hongda, Zhiyong Hu, Kaiwen Zhong, Jianhui Xu, Feifei Zhang, Yi Zhao, and Pinghao Wu. 2019. "Satellite-based high-resolution mapping of ground-level PM2.5 concentrations over East China using a spatiotemporal regression kriging model."  *Science of the Total Environment* 672:479-90. doi: <https://doi.org/10.1016/j.scitotenv.2019.03.480>.

Hu, Xuefei, Jessica H Belle, Xia Meng, Avani Wildani, Lance A Waller, Matthew J Strickland, and Yang Liu. 2017. "Estimating PM2.5 Concentrations in the Conterminous United States Using the Random Forest Approach."  *Environmental Science & Technology* 51 (12):6936-44.

Hu, Xuefei, Lance A. Waller, Mohammad Z. Al-Hamdan, William L. Crosson, Maurice G. Estes, Sue M. Estes, Dale A. Quattrochi, Jeremy A. Sarnat, and Yang Liu. 2013. "Estimating ground-level PM2.5 concentrations in the southeastern U.S. using geographically weighted regression."  *Environmental research* 121:1-10. doi: <https://doi.org/10.1016/j.envres.2012.11.003>.

Hu, Xuefei, Lance A. Waller, Alexei Lyapustin, Yujie Wang, Mohammad Z. Al-Hamdan, William L. Crosson, Maurice G. Estes, et al. 2014. "Estimating ground-level PM2.5 concentrations in the Southeastern United States using MAIAC AOD retrievals and a two-stage model."  *Remote Sensing of Environment* 140:220-32. doi: <https://doi.org/10.1016/j.rse.2013.08.032>.

Hua, Zhenqun, Weiwei Sun, Gang Yang, and Qian Du. 2019. "A Full-Coverage Daily Average PM2.5 Retrieval Method with Two-Stage IVW Fused MODIS C6 AOD and Two-Stage GAM Model."  *Remote Sensing* 11 (13). doi: 10.3390/rs11131558.

Huang, Keyong, Qingyang Xiao, Xia Meng, Guannan Geng, Yujie Wang, Alexei Lyapustin, Dongfeng Gu, and Yang Liu. 2018. "Predicting monthly high-resolution PM2.5 concentrations with random forest model in the North China Plain."  *Environmental Pollution* 242:675-83. doi: <https://doi.org/10.1016/j.envpol.2018.07.016>.

Jiang, Man, Weiwei Sun, Gang Yang, and Dianfa Zhang. 2017. "Modelling seasonal GWR of daily PM2.5 with proper auxiliary variables for the Yangtze River Delta."  *Remote Sensing* 9 (4):346.

Jiang, Qutu, and George Christakos. 2018. "Space-time mapping of ground-level PM2.5 and NO2 concentrations in heavily polluted northern China during winter using the Bayesian maximum entropy technique with satellite data."  *Air Quality, Atmosphere & Health* 11 (1):23-33.

Jung, Chau-Ren, Bing-Fang Hwang, and Wei-Ting Chen. 2018. "Incorporating long-term satellite-based aerosol optical depth, localized land use data, and meteorological variables to estimate ground-level PM2.5 concentrations in Taiwan from 2005 to 2015."  *Environmental Pollution* 237:1000-10. doi: <https://doi.org/10.1016/j.envpol.2017.11.016>.

Kloog, Itai, Alexandra A. Chudnovsky, Allan C. Just, Francesco Nordio, Petros Koutrakis, Brent A. Coull, Alexei Lyapustin, Yujie Wang, and Joel Schwartz. 2014. "A new hybrid spatio-temporal model for estimating daily multi-year PM2.5 concentrations across northeastern USA using high resolution aerosol optical depth data."  *Atmospheric environment* 95:581-90. doi: <https://doi.org/10.1016/j.atmosenv.2014.07.014>.

Kloog, Itai, Petros Koutrakis, Brent A. Coull, Hyung Joo Lee, and Joel Schwartz. 2011. "Assessing temporally and spatially resolved PM2.5 exposures for epidemiological studies using satellite aerosol optical depth measurements."  *Atmospheric environment* 45 (35):6267-75. doi: <https://doi.org/10.1016/j.atmosenv.2011.08.066>.

Kloog, Itai, Meytar Sorek-Hamer, Alexei Lyapustin, Brent Coull, Yujie Wang, Allan C. Just, Joel Schwartz, and David M. Broday. 2015. "Estimating daily PM2.5 and PM10 across the complex geo-climate region of Israel using MAIAC satellite-based AOD data."  *Atmospheric environment* 122:409-16. doi: <https://doi.org/10.1016/j.atmosenv.2015.10.004>.

Kumar, Rajesh, Luca Delle Monache, Jamie Bresch, Pablo E. Saide, Youhua Tang, Zhiquan Liu, Arlindo M. da Silva, et al. 2019. "Toward Improving Short-Term Predictions of Fine Particulate Matter Over the United States Via Assimilation of Satellite Aerosol Optical Depth Retrievals."  *Journal of Geophysical Research: Atmospheres* 124 (5):2753-73. doi: 10.1029/2018JD029009.

Lee, Hyung Joo, Robert B. Chatfield, and Anthony W. Strawa. 2016. "Enhancing the Applicability of Satellite Remote Sensing for PM2.5 Estimation Using MODIS Deep Blue AOD and Land Use Regression in California, United States."  *Environmental Science & Technology* 50 (12):6546-55. doi: 10.1021/acs.est.6b01438.

Li, Lianfa, Jiehao Zhang, Xia Meng, Ying Fang, Yong Ge, Jinfeng Wang, Chengyi Wang, Jun Wu, and Haidong Kan. 2018. "Estimation of PM2.5 concentrations at a high spatiotemporal resolution using constrained mixed-effect bagging models with MAIAC aerosol optical depth."  *Remote Sensing of Environment* 217:573-86. doi: <https://doi.org/10.1016/j.rse.2018.09.001>.

Li, Lijuan, Baozhang Chen, Yanhu Zhang, Youzheng Zhao, Yue Xian, Guang Xu, Huifang Zhang, and Lifeng Guo. 2018. "Retrieval of Daily PM2.5 Concentrations Using Nonlinear Methods: A Case Study of the Beijing–Tianjin–Hebei Region, China."  *Remote Sensing* 10 (12). doi: 10.3390/rs10122006.

Li, Rong, Jianhua Gong, Liangfu Chen, and Zifeng Wang. 2015. "Estimating Ground-Level PM2.5 Using Fine-Resolution Satellite Data in the Megacity of Beijing, China."  *Aerosol Air Qual. Res* 15:1347-56. doi: 10.4209/aaqr.2015.01.0009.

Li, Runkui, Tianxiao Ma, Qun Xu, and Xianfeng Song. 2018. "Using MAIAC AOD to verify the PM2.5 spatial patterns of a land use regression model."  *Environmental Pollution* 243:501-9. doi: <https://doi.org/10.1016/j.envpol.2018.09.026>.

Li, Tongwen, Huanfeng Shen, Qiangqiang Yuan, Xuechen Zhang, and Liangpei Zhang. 2017. "Estimating Ground‐Level PM2.5 by Fusing Satellite and Station Observations: A Geo‐Intelligent Deep Learning Approach."  *Geophysical Research Letters* 44 (23).

Li, Tongwen, Huanfeng Shen, Chao Zeng, Qiangqiang Yuan, and Liangpei Zhang. 2017. "Point-surface fusion of station measurements and satellite observations for mapping PM2.5 distribution in China: Methods and assessment."  *Atmospheric environment* 152:477-89.

Li, Xintong, and Xiaodong Zhang. 2019. "Predicting ground-level PM2.5 concentrations in the Beijing-Tianjin-Hebei region: A hybrid remote sensing and machine learning approach."  *Environmental Pollution* 249:735-49. doi: <https://doi.org/10.1016/j.envpol.2019.03.068>.

Li, Ying, Yong Xue, Jie Guang, Lu She, Cheng Fan, and Guili Chen. 2018. "Ground-Level PM2.5 Concentration Estimation from Satellite Data in the Beijing Area Using a Specific Particle Swarm Extinction Mass Conversion Algorithm."  *Remote Sensing* 10 (12). doi: 10.3390/rs10121906.

Li, Zhengqiang, Ying Zhang, Jie Shao, Baosheng Li, Jin Hong, Dong Liu, Donghui Li, Peng Wei, Wei Li, and Lei Li. 2016. "Remote sensing of atmospheric particulate mass of dry PM2.5 near the ground: Method validation using ground-based measurements."  *Remote Sensing of Environment* 173:59-68.

Lin, C. Q., G. Liu, A. K. H. Lau, Y. Li, C. C. Li, J. C. H. Fung, and X. Q. Lao. 2018. "High-resolution satellite remote sensing of provincial PM2.5 trends in China from 2001 to 2015."  *Atmospheric environment* 180:110-6. doi: <https://doi.org/10.1016/j.atmosenv.2018.02.045>.

Lin, Changqing, Ying Li, Zibing Yuan, Alexis K. H. Lau, Chengcai Li, and Jimmy C. H. Fung. 2015. "Using satellite remote sensing data to estimate the high-resolution distribution of ground-level PM2.5."  *Remote Sensing of Environment* 156:117-28. doi: <https://doi.org/10.1016/j.rse.2014.09.015>.

Liu, Jianjun, Fuzhong Weng, and Zhanqing Li. 2019. "Satellite-based PM2.5 estimation directly from reflectance at the top of the atmosphere using a machine learning algorithm."  *Atmospheric environment* 208:113-22. doi: <https://doi.org/10.1016/j.atmosenv.2019.04.002>.

Luo, Nana, Man Sing Wong, Wenji Zhao, Xing Yan, and Fei Xiao. 2015. "Improved aerosol retrieval algorithm using Landsat images and its application for PM10 monitoring over urban areas."  *Atmospheric Research* 153:264-75. doi: <https://doi.org/10.1016/j.atmosres.2014.08.012>.

Lv, Baolei, Yongtao Hu, Howard H Chang, Armistead G Russell, Jun Cai, Bing Xu, and Yuqi Bai. 2017. "Daily estimation of ground-level PM2.5 concentrations at 4 km resolution over Beijing-Tianjin-Hebei by fusing MODIS AOD and ground observations."  *Science of the Total Environment* 580:235-44.

Ma, Zongwei, Xuefei Hu, Lei Huang, Jun Bi, and Yang Liu. 2014. "Estimating Ground-Level PM2.5 in China Using Satellite Remote Sensing."  *Environmental Science & Technology* 48 (13):7436-44. doi: 10.1021/es5009399.

Ma, Zongwei, Xuefei Hu, M. Sayer Andrew, Robert Levy, Qiang Zhang, Yingang Xue, Shilu Tong, Jun Bi, Lei Huang, and Yang Liu. 2016. "Satellite-Based Spatiotemporal Trends in PM2.5 Concentrations: China, 2004–2013."  *Environmental health perspectives* 124 (2):184-92. doi: 10.1289/ehp.1409481.

Ma, Zongwei, Yang Liu, Qiuyue Zhao, Miaomiao Liu, Yuanchun Zhou, and Jun Bi. 2016. "Satellite-derived high resolution PM2.5 concentrations in Yangtze River Delta Region of China using improved linear mixed effects model."  *Atmospheric environment* 133:156-64. doi: <https://doi.org/10.1016/j.atmosenv.2016.03.040>.

Mao, Liang, Youliang Qiu, Claudia Kusano, and Xiaohui Xu. 2012. "Predicting regional space–time variation of PM2.5 with land-use regression model and MODIS data."  *Environmental Science and Pollution Research* 19 (1):128-38. doi: 10.1007/s11356-011-0546-9.

Mao, Xi, Tao Shen, and Xiao Feng. 2017. "Prediction of hourly ground-level PM2.5 concentrations 3 days in advance using neural networks with satellite data in eastern China."  *Atmospheric Pollution Research* 8 (6):1005-15. doi: <https://doi.org/10.1016/j.apr.2017.04.002>.

Meng, Xia, Qingyan Fu, Zongwei Ma, Li Chen, Bin Zou, Yan Zhang, Wenbo Xue, et al. 2016. "Estimating ground-level PM10 in a Chinese city by combining satellite data, meteorological information and a land use regression model."  *Environmental Pollution* 208:177-84. doi: <https://doi.org/10.1016/j.envpol.2015.09.042>.

Nabavi, Seyed Omid, Leopold Haimberger, and Esmail Abbasi. 2019. "Assessing PM2.5 concentrations in Tehran, Iran, from space using MAIAC, deep blue, and dark target AOD and machine learning algorithms."  *Atmospheric Pollution Research* 10 (3):889-903. doi: <https://doi.org/10.1016/j.apr.2018.12.017>.

Nordio, Francesco, Itai Kloog, Brent A Coull, Alexandra Chudnovsky, Paolo Grillo, Pier Alberto Bertazzi, Andrea A Baccarelli, and Joel Schwartz. 2013. "Estimating spatio-temporal resolved PM10 aerosol mass concentrations using MODIS satellite data and land use regression over Lombardy, Italy."  *Atmospheric environment* 74:227-36.

Pang, Jiongming, Zhiquan Liu, Xuemei Wang, Jamie Bresch, Junmei Ban, Dan Chen, and Jhoon Kim. 2018. "Assimilating AOD retrievals from GOCI and VIIRS to forecast surface PM2.5 episodes over Eastern China."  *Atmospheric environment* 179:288-304.

Park, S., M. Shin, J. Im, C. K. Song, M. Choi, J. Kim, S. Lee, et al. 2019. "Estimation of ground-level particulate matter concentrations through the synergistic use of satellite observations and process-based models over South Korea."  *Atmos. Chem. Phys.* 19 (2):1097-113. doi: 10.5194/acp-19-1097-2019.

Pereira, Gavin, Hyung Joo Lee, Michelle Bell, Annette Regan, Eva Malacova, Ben Mullins, and Luke D Knibbs. 2017. "Development of a model for particulate matter pollution in Australia with implications for other satellite-based models."  *Environmental research* 159:9-15.

Qin, Kai, Jiaheng Zou, Jianping Guo, Meng Lu, Muhammad Bilal, Kefei Zhang, Fangfang Ma, and Yishu Zhang. 2018. "Estimating PM1 concentrations from MODIS over Yangtze River Delta of China during 2014–2017."  *Atmospheric environment* 195:149-58. doi: <https://doi.org/10.1016/j.atmosenv.2018.09.054>.

Saleh, Salah Abdul Hameed, and Ghada Hasan. 2014. "Estimation of PM10 concentration using ground measurements and Landsat 8 OLI satellite image."  *J Geophys Remote Sens* 3 (120):2169-0049.

Sarafian, Ron, Itai Kloog, Allan C. Just, and Johnathan D. Rosenblatt. 2019. "Gaussian Markov Random Fields versus Linear Mixed Models for satellite-based PM2.5 assessment: Evidence from the Northeastern USA."  *Atmospheric environment* 205:30-5. doi: <https://doi.org/10.1016/j.atmosenv.2019.02.025>.

Sathe, Yogesh, Santosh Kulkarni, Pawan Gupta, Akshara Kaginalkar, Sahidul Islam, and Prashant Gargava. 2019. "Application of Moderate Resolution Imaging Spectroradiometer (MODIS) Aerosol Optical Depth (AOD) and Weather Research Forecasting (WRF) model meteorological data for assessment of fine particulate matter (PM2.5) over India."  *J Atmospheric Pollution Research* 10 (2):418-34.

Saunders, Rolando O., Jonathan D. W. Kahl, and Jugal K. Ghorai. 2014. "Improved estimation of PM2.5 using Lagrangian satellite-measured aerosol optical depth."  *Atmospheric environment* 91:146-53. doi: <https://doi.org/10.1016/j.atmosenv.2014.03.060>.

Shi, Yuan, Hung Chak Ho, Yong Xu, and Edward Ng. 2018. "Improving satellite aerosol optical Depth-PM2.5 correlations using land use regression with microscale geographic predictors in a high-density urban context."  *Atmospheric environment* 190:23-34. doi: <https://doi.org/10.1016/j.atmosenv.2018.07.021>.

Song, Weize, Haifeng Jia, Jingfeng Huang, and Yiyue Zhang. 2014. "A satellite-based geographically weighted regression model for regional PM2.5 estimation over the Pearl River Delta region in China."  *Remote Sensing of Environment* 154:1-7. doi: <https://doi.org/10.1016/j.rse.2014.08.008>.

Soni, Manish, Swagata Payra, and Sunita Verma. 2018. "Particulate matter estimation over a semi arid region Jaipur, India using satellite AOD and meteorological parameters."  *Atmospheric Pollution Research* 9 (5):949-58. doi: <https://doi.org/10.1016/j.apr.2018.03.001>.

Sorek-Hamer, M., A. W. Strawa, R. B. Chatfield, R. Esswein, A. Cohen, and D. M. Broday. 2013. "Improved retrieval of PM2.5 from satellite data products using non-linear methods."  *Environmental Pollution* 182:417-23. doi: <https://doi.org/10.1016/j.envpol.2013.08.002>.

Stafoggia, Massimo, Tom Bellander, Simone Bucci, Marina Davoli, Kees de Hoogh, Francesca de' Donato, Claudio Gariazzo, et al. 2019. "Estimation of daily PM10 and PM2.5 concentrations in Italy, 2013–2015, using a spatiotemporal land-use random-forest model."  *Environment International* 124:170-9. doi: <https://doi.org/10.1016/j.envint.2019.01.016>.

Stafoggia, Massimo, Joel Schwartz, Chiara Badaloni, Tom Bellander, Ester Alessandrini, Giorgio Cattani, Francesca De'Donato, Alessandra Gaeta, Gianluca Leone, and Alexei Lyapustin. 2017. "Estimation of daily PM10 concentrations in Italy (2006–2012) using finely resolved satellite data, land use variables and meteorology."  *Environment International* 99:234-44.

Sun, Y., Q. Zeng, B. Geng, X. Lin, B. Sude, and L. Chen. 2019. "Deep Learning Architecture for Estimating Hourly Ground-Level PM2.5 Using Satellite Remote Sensing."  *IEEE Geoscience and Remote Sensing Letters* 16 (9):1343-7. doi: 10.1109/LGRS.2019.2900270.

Tian, Jie, and Dongmei Chen. 2010. "A semi-empirical model for predicting hourly ground-level fine particulate matter (PM2.5) concentration in southern Ontario from satellite remote sensing and ground-based meteorological measurements."  *Remote Sensing of Environment* 114 (2):221-9. doi: <https://doi.org/10.1016/j.rse.2009.09.011>.

van Donkelaar, Aaron, Randall V Martin, Michael Brauer, N Christina Hsu, Ralph A Kahn, Robert C Levy, Alexei Lyapustin, Andrew M Sayer, and David M Winker. 2016. "Global estimates of fine particulate matter using a combined geophysical-statistical method with information from satellites, models, and monitors."  *Environmental Science & Technology* 50 (7):3762-72.

van Donkelaar, Aaron, Randall V Martin, Michael Brauer, Ralph Kahn, Robert Levy, Carolyn Verduzco, and Paul J Villeneuve. 2010. "Global estimates of ambient fine particulate matter concentrations from satellite-based aerosol optical depth: development and application."  *Environmental health perspectives* 118 (6):847.

van Donkelaar, Aaron, Randall V. Martin, Robert C. Levy, Arlindo M. da Silva, Michal Krzyzanowski, Natalia E. Chubarova, Eugenia Semutnikova, and Aaron J. Cohen. 2011. "Satellite-based estimates of ground-level fine particulate matter during extreme events: A case study of the Moscow fires in 2010."  *Atmospheric environment* 45 (34):6225-32. doi: <https://doi.org/10.1016/j.atmosenv.2011.07.068>.

van Donkelaar, Aaron, Randall V. Martin, Chi Li, and Richard T. Burnett. 2019. "Regional Estimates of Chemical Composition of Fine Particulate Matter Using a Combined Geoscience-Statistical Method with Information from Satellites, Models, and Monitors."  *Environmental Science & Technology* 53 (5):2595-611. doi: 10.1021/acs.est.8b06392.

van Donkelaar, Aaron, Randall V. Martin, Robert J. D. Spurr, and Richard T. Burnett. 2015. "High-Resolution Satellite-Derived PM2.5 from Optimal Estimation and Geographically Weighted Regression over North America."  *Environmental Science & Technology* 49 (17):10482-91. doi: 10.1021/acs.est.5b02076.

Wang, Wei, Feiyue Mao, Bin Zou, Jianping Guo, Lixin Wu, Zengxin Pan, and Lin Zang. 2019. "Two-stage model for estimating the spatiotemporal distribution of hourly PM1.0 concentrations over central and east China."  *Science of the Total Environment* 675:658-66. doi: <https://doi.org/10.1016/j.scitotenv.2019.04.134>.

Wang, Weilin, Suli Zhao, Limin Jiao, Michael Taylor, Boen Zhang, Gang Xu, and Haobo Hou. 2019. "Estimation of PM2.5 Concentrations in China Using a Spatial Back Propagation Neural Network."  *Scientific Reports* 9 (1):13788. doi: 10.1038/s41598-019-50177-1.

Wang, Xinpeng, and Wenbin Sun. 2019. "Meteorological parameters and gaseous pollutant concentrations as predictors of daily continuous PM2.5 concentrations using deep neural network in Beijing–Tianjin–Hebei, China."  *Atmospheric environment* 211:128-37. doi: <https://doi.org/10.1016/j.atmosenv.2019.05.004>.

Wang, Zifeng, Liangfu Chen, Jinhua Tao, Ying Zhang, and Lin Su. 2010. "Satellite-based estimation of regional particulate matter (PM) in Beijing using vertical-and-RH correcting method."  *Remote Sensing of Environment* 114 (1):50-63.

Wei, Jing, Wei Huang, Zhanqing Li, Wenhao Xue, Yiran Peng, Lin Sun, and Maureen Cribb. 2019. "Estimating 1-km-resolution PM2.5 concentrations across China using the space-time random forest approach."  *Remote Sensing of Environment* 231:111221. doi: <https://doi.org/10.1016/j.rse.2019.111221>.

Wu, Jiansheng, Fei Yao, Weifeng Li, and Menglin Si. 2016. "VIIRS-based remote sensing estimation of ground-level PM2.5 concentrations in Beijing–Tianjin–Hebei: A spatiotemporal statistical model."  *Remote Sensing of Environment* 184:316-28. doi: <https://doi.org/10.1016/j.rse.2016.07.015>.

Xiao, Lu, Yichao Lang, and George Christakos. 2018. "High-resolution spatiotemporal mapping of PM2.5 concentrations at Mainland China using a combined BME-GWR technique."  *Atmospheric environment* 173:295-305. doi: <https://doi.org/10.1016/j.atmosenv.2017.10.062>.

Xiao, Qingyang, Yujie Wang, Howard H. Chang, Xia Meng, Guannan Geng, Alexei Lyapustin, and Yang Liu. 2017. "Full-coverage high-resolution daily PM2.5 estimation using MAIAC AOD in the Yangtze River Delta of China."  *Remote Sensing of Environment* 199:437-46. doi: <https://doi.org/10.1016/j.rse.2017.07.023>.

Xie, Yuanyu, Yuxuan Wang, Muhammad Bilal, and Wenhao Dong. 2019. "Mapping daily PM2.5 at 500 m resolution over Beijing with improved hazy day performance."  *Science of the Total Environment* 659:410-8. doi: <https://doi.org/10.1016/j.scitotenv.2018.12.365>.

Xie, Yuanyu, Yuxuan Wang, Kai Zhang, Wenhao Dong, Baolei Lv, and Yuqi Bai. 2015. "Daily Estimation of Ground-Level PM2.5 Concentrations over Beijing Using 3 km Resolution MODIS AOD."  *Environmental Science & Technology* 49 (20):12280-8. doi: 10.1021/acs.est.5b01413.

Xu, J-W, RV Martin, A Van Donkelaar, J Kim, M Choi, Q Zhang, G Geng, Y Liu, Z Ma, and L Huang. 2015. "Estimating ground-level PM2.5 in eastern China using aerosol optical depth determined from the GOCI satellite instrument."  *Atmospheric Chemistry and Physics* 15 (22):13133-44.

Xu, Yongming, Hung Chak Ho, Man Sing Wong, Chengbin Deng, Yuan Shi, Ta-Chien Chan, and Anders Knudby. 2018. "Evaluation of machine learning techniques with multiple remote sensing datasets in estimating monthly concentrations of ground-level PM2. 5."  *Environmental Pollution* 242:1417-26.

Xue, Tao, Yixuan Zheng, Dan Tong, Bo Zheng, Xin Li, Tong Zhu, and Qiang Zhang. 2019. "Spatiotemporal continuous estimates of PM2.5 concentrations in China, 2000–2016: A machine learning method with inputs from satellites, chemical transport model, and ground observations."  *Environment International* 123:345-57. doi: <https://doi.org/10.1016/j.envint.2018.11.075>.

Yan, Xing, Wenzhong Shi, Zhanqing Li, Zhengqiang Li, Nana Luo, Wenji Zhao, Haofei Wang, and Xue Yu. 2017. "Satellite-based PM2.5 estimation using fine-mode aerosol optical thickness over China."  *Atmospheric environment* 170:290-302. doi: <https://doi.org/10.1016/j.atmosenv.2017.09.023>.

Yang, Lijuan, Hanqiu Xu, and Zhifan Jin. 2019. "Estimating ground-level PM2.5 over a coastal region of China using satellite AOD and a combined model."  *Journal of cleaner production* 227:472-82. doi: <https://doi.org/10.1016/j.jclepro.2019.04.231>.

Yang, Xiaofan, Yixuan Zheng, Guannan Geng, Huan Liu, Hanyang Man, Zhaofeng Lv, Kebin He, and Kees de Hoogh. 2017. "Development of PM2.5 and NO2 models in a LUR framework incorporating satellite remote sensing and air quality model data in Pearl River Delta region, China."  *Environmental Pollution* 226:143-53. doi: <https://doi.org/10.1016/j.envpol.2017.03.079>.

Yao, Fei, Menglin Si, Weifeng Li, and Jiansheng Wu. 2018. "A multidimensional comparison between MODIS and VIIRS AOD in estimating ground-level PM2.5 concentrations over a heavily polluted region in China."  *Science of the Total Environment* 618:819-28. doi: <https://doi.org/10.1016/j.scitotenv.2017.08.209>.

Yao, Fei, Jiansheng Wu, Weifeng Li, and Jian Peng. 2019a. "Estimating Daily PM2.5 Concentrations in Beijing Using 750-M VIIRS IP AOD Retrievals and a Nested Spatiotemporal Statistical Model."  *Remote Sensing* 11 (7). doi: 10.3390/rs11070841.

———. 2019b. "A spatially structured adaptive two-stage model for retrieving ground-level PM2.5 concentrations from VIIRS AOD in China."  *ISPRS Journal of Photogrammetry and Remote Sensing* 151:263-76. doi: <https://doi.org/10.1016/j.isprsjprs.2019.03.011>.

Yeganeh, Bijan, Michael G. Hewson, Samuel Clifford, Luke D. Knibbs, and Lidia Morawska. 2017. "A satellite-based model for estimating PM2.5 concentration in a sparsely populated environment using soft computing techniques."  *Environmental Modelling & Software* 88:84-92. doi: <https://doi.org/10.1016/j.envsoft.2016.11.017>.

You, Wei, Zengliang Zang, Xiaobin Pan, Lifeng Zhang, and Dan Chen. 2015. "Estimating PM2.5 in Xi'an, China using aerosol optical depth: A comparison between the MODIS and MISR retrieval models."  *Science of the Total Environment* 505:1156-65. doi: <https://doi.org/10.1016/j.scitotenv.2014.11.024>.

You, Wei, Zengliang Zang, Lifeng Zhang, Yi Li, Xiaobin Pan, and Weiqi Wang. 2016. "National-scale estimates of ground-level PM2.5 concentration in China using geographically weighted regression based on 3 km resolution MODIS AOD."  *Remote Sensing* 8 (3):184.

You, Wei, Zengliang Zang, Lifeng Zhang, Yi Li, and Weiqi Wang. 2016. "Estimating national-scale ground-level PM2.5 concentration in China using geographically weighted regression based on MODIS and MISR AOD."  *Environmental Science and Pollution Research* 23 (9):8327-38. doi: 10.1007/s11356-015-6027-9.

You, Wei, Zengliang Zang, Lifeng Zhang, Zhijin Li, Dan Chen, and Gui Zhang. 2015. "Estimating ground-level PM10 concentration in northwestern China using geographically weighted regression based on satellite AOD combined with CALIPSO and MODIS fire count."  *Remote Sensing of Environment* 168:276-85.

You, Wei, Zengliang Zang, Lifeng Zhang, Mei Zhang, Xiaobin Pan, and Yi Li. 2016. "A nonlinear model for estimating ground-level PM10 concentration in Xi'an using MODIS aerosol optical depth retrieval."  *Atmospheric Research* 168:169-79.

Zang, Lin, Feiyue Mao, Jianping Guo, Wei Gong, Wei Wang, and Zengxin Pan. 2018. "Estimating hourly PM1 concentrations from Himawari-8 aerosol optical depth in China."  *Environmental Pollution* 241:654-63. doi: <https://doi.org/10.1016/j.envpol.2018.05.100>.

Zang, Lin, Feiyue Mao, Jianping Guo, Wei Wang, Zengxin Pan, Huanfeng Shen, Bo Zhu, and Zemin Wang. 2019. "Estimation of spatiotemporal PM1.0 distributions in China by combining PM2.5 observations with satellite aerosol optical depth."  *Science of the Total Environment* 658:1256-64. doi: <https://doi.org/10.1016/j.scitotenv.2018.12.297>.

Zeydan, Özgür, and Yuhang Wang. 2019. "Using MODIS derived aerosol optical depth to estimate ground-level PM2.5 concentrations over Turkey."  *Atmospheric Pollution Research* 10 (5):1565-76. doi: <https://doi.org/10.1016/j.apr.2019.05.005>.

Zhai, Liang, Shuang Li, Bin Zou, Huiyong Sang, Xin Fang, and Shan Xu. 2018. "An improved geographically weighted regression model for PM2.5 concentration estimation in large areas."  *Atmospheric environment* 181:145-54. doi: <https://doi.org/10.1016/j.atmosenv.2018.03.017>.

Zhan, Yu, Yuzhou Luo, Xunfei Deng, Huajin Chen, Michael L Grieneisen, Xueyou Shen, Lizhong Zhu, and Minghua Zhang. 2017. "Spatiotemporal prediction of continuous daily PM2.5 concentrations across China using a spatially explicit machine learning algorithm."  *Atmospheric environment* 155:129-39.

Zhang, Ruixin, Baofeng Di, Yuzhou Luo, Xunfei Deng, Michael L. Grieneisen, Zhigao Wang, Gang Yao, and Yu Zhan. 2018. "A nonparametric approach to filling gaps in satellite-retrieved aerosol optical depth for estimating ambient PM2.5 levels."  *Environmental Pollution* 243:998-1007. doi: <https://doi.org/10.1016/j.envpol.2018.09.052>.

Zhang, Taixin, Lin Zang, Youchuan Wan, Wei Wang, and Yi Zhang. 2019. "Ground-level PM2.5 estimation over urban agglomerations in China with high spatiotemporal resolution based on Himawari-8."  *Science of the Total Environment* 676:535-44. doi: <https://doi.org/10.1016/j.scitotenv.2019.04.299>.

Zhang, Tianhao, Wei Gong, Wei Wang, Yuxi Ji, Zhongmin Zhu, and Yusi Huang. 2016. "Ground Level PM2.5 Estimates over China Using Satellite-Based Geographically Weighted Regression (GWR) Models Are Improved by Including NO2 and Enhanced Vegetation Index (EVI)."  *International Journal of Environmental Research and Public Health* 13 (12). doi: 10.3390/ijerph13121215.

Zhang, Tianhao, Gang Liu, Zhongmin Zhu, Wei Gong, Yuxi Ji, and Yusi Huang. 2016. "Real-Time Estimation of Satellite-Derived PM2.5 Based on a Semi-Physical Geographically Weighted Regression Model."  *International Journal of Environmental Research and Public Health* 13 (10). doi: 10.3390/ijerph13100974.

Zhang, Tianhao, Zhongmin Zhu, Wei Gong, Zerun Zhu, Kun Sun, Lunche Wang, Yusi Huang, et al. 2018. "Estimation of ultrahigh resolution PM2.5 concentrations in urban areas using 160 m Gaofen-1 AOD retrievals."  *Remote Sensing of Environment* 216:91-104. doi: <https://doi.org/10.1016/j.rse.2018.06.030>.

Zhang, Xueying, Yiyi Chu, Yuxuan Wang, and Kai Zhang. 2018. "Predicting daily PM2.5 concentrations in Texas using high-resolution satellite aerosol optical depth."  *Science of the Total Environment* 631-632:904-11. doi: <https://doi.org/10.1016/j.scitotenv.2018.02.255>.

Zhang, Ying, and Zhengqiang Li. 2015. "Remote sensing of atmospheric fine particulate matter (PM2.5) mass concentration near the ground from satellite observation."  *Remote Sensing of Environment* 160:252-62.

Zhang, Zhenyu, Jianbing Wang, Jaime E. Hart, Francine Laden, Chen Zhao, Tiantian Li, Peiwen Zheng, Die Li, Zhenhua Ye, and Kun Chen. 2018. "National scale spatiotemporal land-use regression model for PM2.5, PM10 and NO2 concentration in China."  *Atmospheric environment* 192:48-54. doi: <https://doi.org/10.1016/j.atmosenv.2018.08.046>.

Zheng, Yixuan, Qiang Zhang, Yang Liu, Guannan Geng, and Kebin He. 2016. "Estimating ground-level PM2.5 concentrations over three megalopolises in China using satellite-derived aerosol optical depth measurements."  *Atmospheric environment* 124:232-42.

Zou, Bin, Jingwen Chen, Liang Zhai, Xin Fang, and Zhong Zheng. 2017. "Satellite Based Mapping of Ground PM2.5 Concentration Using Generalized Additive Modeling."  *Remote Sensing* 9 (1). doi: 10.3390/rs9010001.

Zou, Bin, Qiang Pu, Muhammad Bilal, Qihao Weng, Liang Zhai, and Janet E Nichol. 2016. "High-resolution satellite mapping of fine particulates based on geographically weighted regression."  *IEEE Geoscience and Remote Sensing Letters* 13 (4):495-9.
